# Supplementary material for: Genomic variation in myeloma: design, content, and initial application of the Bank On A Cure SNP Panel to detect associations with progression-free survival
Source: PubMed Central journal article supplement (PMC2553089; doi:10.1186/1741-7015-6-26), 2008-09-08

## Additional File 1: Chromosomal distribution of BOAC SNP panel

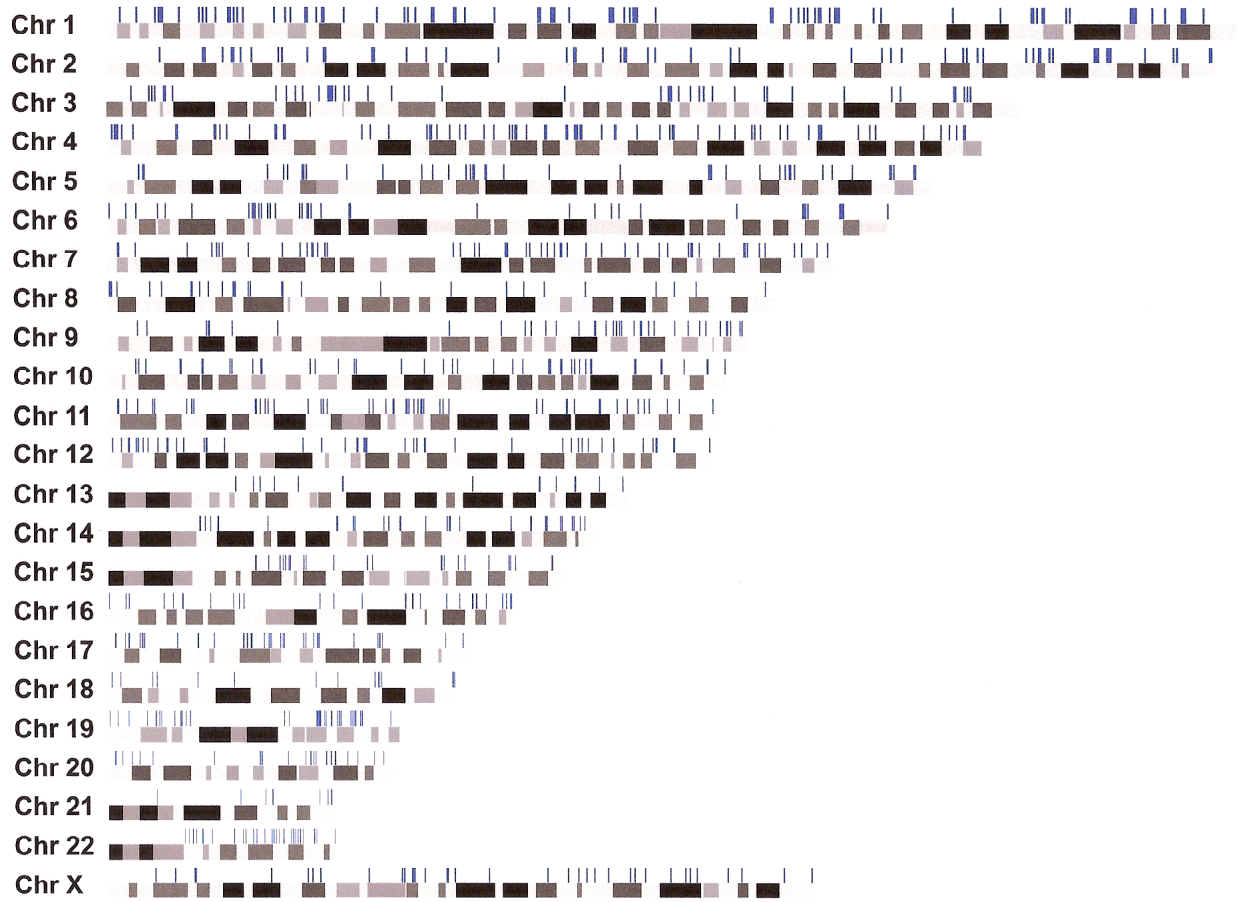

Supplement: 1741-7015-6-26-S1.pdf [file 1741-7015-6-26-S1.pdf]
